# Supplementary material
Source: MDPI journal article supplement (https://www.mdpi.com/2073-4441/15/4/732)
Supplement: s1 [file s1]

## Supplementary Information

**Table S1.** Overview of the locations of the flush samples in the distribution system (DWDS) Zeeuws-Vlaanderen.

| Part of DWDS    | Location    | Research period | Inner diameter (mm) | Pipe material | Year of construction of eldest part |
|-----------------|-------------|-----------------|---------------------|---------------|-------------------------------------|
| Eastern section | Heikant     | 2011-2022       | 88                  | AC            | 1950                                |
|                 | Hulst       | 2011-2017       | 100                 | AC            | 1977                                |
|                 |             | 2018-2022       | 113                 | AC            | 1900                                |
|                 | Nieuw Namen | 2011-2022       | 88                  | AC            | 1950                                |
| Western section | Axel        | 2011-2018       | 100                 | PVC           | 1993                                |
|                 |             | 2019-2022       | 106.7               | PVC           | 1998                                |
|                 | Cadzand     | 2011-2022       | 100                 | AC            | 1979                                |
|                 | Philippine  | 2011-2022       | 106.7               | PVC           | 1992                                |

AC: asbeston cementon; PVC: polyvenylchlorid

**Table S2.** Sampling scheme, parameters and frequencies per location.

| Sampling location                       | Parameter                         | Season           | Number of samples per year |                |
|-----------------------------------------|-----------------------------------|------------------|----------------------------|----------------|
| Drinking water at treatment plant       |                                   |                  | TP#2                       | TP#9           |
|                                         | pH                                | whole year       | 52                         | 26             |
|                                         | Fe                                | whole year       | 26                         | 104            |
|                                         | Mn                                | whole year       | 26                         | 104            |
|                                         | DOC                               | whole year       | 13                         | 4              |
|                                         | BP LC-OCD                         | whole year       | 13-52 (since 2015)         | 4 (since 2020) |
|                                         | Biomass ATP                       | whole year       | 52                         | 13             |
|                                         | BPC <sub>14</sub>                 | whole year       | 26 (since 2019)            | 4 (since 2019) |
|                                         | AOC A3                            | whole year       | 8 (since 2019)             | 4 (since 2020) |
|                                         | AOC P17/NOX                       | whole year       | 8-13                       | 1-4            |
| Drinking water in DWDS                  |                                   |                  | West section               | East section   |
|                                         | Invertebrates                     | August - October | 3                          | 3              |
|                                         | Sediment volume                   | August - October | 3                          | 3              |
|                                         | Turbidity test                    | May-August       | 40                         | 17             |
| Drinking water at the tap of households |                                   |                  | West section               | East section   |
|                                         | Aeromonas at 30 °C                | July-September   | 21-55                      | 8-18           |
|                                         | Heterotrophic Plate Count at 22°C | July-September   | 26-98                      | 8-27           |
|                                         | Fe                                | whole year       | 6                          | 26             |

**Table S3.** ANOVA test (F-value, df1; df2 and p-value) of different parameters and comparison per period (Games-Howell post-hoc test, p-value).

| Parameter                            | Zeeuws-Vlaanderen western section    |                                   |                                   |                                   | Zeeuws-Vlaanderen eastern section    |                                   |                                   |                                   |
|--------------------------------------|--------------------------------------|-----------------------------------|-----------------------------------|-----------------------------------|--------------------------------------|-----------------------------------|-----------------------------------|-----------------------------------|
|                                      | ANOVA                                | 2011-2014<br>versus 2015-<br>2018 | 2011-2014<br>versus 2019-<br>2022 | 2015-2018<br>versus 2019-<br>2022 | ANOVA                                | 2011-2014<br>versus 2015-<br>2018 | 2011-2014<br>versus 2019-<br>2022 | 2015-2018<br>versus 2019-<br>2022 |
| <i>Aeromonas</i> at 30 °C            | F=5.88; df1 2;<br>df 2 291;<br><0.01 | n.s.                              | n.s                               | <0.01<br>15-18 > 19-22            | F=65,3; df1 2;<br>df2 101;<br><0.001 | <0.001<br>15-18 > 11-14-          | <0.001<br>19-22 > 11-14           | <0.001<br>19-22 > 15-18           |
| Heterotrophic Plate<br>Count at 22°C | F=14.6; df1 2;<br>df2 331;<br><0.001 | <0.001<br>11-14 > 15-18           | <0.001<br>11-14 > 19-22           | n.s                               | F=35.6; df1 2;<br>df2 133;<br><0.001 | n.s.                              | <0.001<br>19-22 > 11-14           | <0.001<br>19-22 > 15-18           |
| Sediment volume 100<br>µm            | F=0.126; 2 df;<br>df2 22;<br>n.s.    |                                   |                                   |                                   | F=1.31; df1 2;<br>df2 19;<br>n.s.    |                                   |                                   |                                   |
| Invertebrate biomass                 | F=0.794; df1 2;<br>df2 22;<br>n.s.   |                                   |                                   |                                   | F=7.88; df1 2;<br>df2 19;<br><0.01   | n.s.                              | <0.05<br>19-22 > 11-14            | <0.01<br>19-22 > 15-18            |

**Table S4.** Results of the Mann-Whitney test of results of a drinking water turbidity test induced by an increase op the velocity with 0.25 m/s in the distribution pipes and the Fe concentrations in the sediment of flush samples of the DWDS; U-value = Test statistic of Mann-Whitney test; sd = standard deviation; n = number of samples.

| <b>Turbidity (2019-2021)</b> | <b>Western section</b> | <b>Eastern section</b> |
|------------------------------|------------------------|------------------------|
| U-value                      | 3077                   |                        |
| p-value                      | <0.001                 |                        |
| average±sd (FNU)             | 8.9±13.4               | 27.6±12.2              |
| n                            | 160                    | 67                     |

  

| <b>Fe in sediment of flush samples (2014-2022)</b> | <b>Western part</b> | <b>Eastern part</b> |
|----------------------------------------------------|---------------------|---------------------|
| U-value                                            | 113                 |                     |
| p-value                                            | <0.001              |                     |
| AVERAGE ±sd (mg/L)                                 | 0.9±1.1             | 3.5±3.1             |
| n                                                  | 27                  | 27                  |

**Table S5.** Biomass (mg FW/m<sup>3</sup>) per taxon in the individual flush samples.

| Section | Year | Location    | Chydoridae | Halacaridae | nauplius<br>larvae of<br>copepods | Cyclopoida | Harpacticoida | <i>Asellus<br/>aquaticus</i> | Turbellaria | Oligochaeta | other<br>invertebrates |
|---------|------|-------------|------------|-------------|-----------------------------------|------------|---------------|------------------------------|-------------|-------------|------------------------|
| East    | 2011 | Nieuw-Namen | 1.61       |             |                                   |            | 0.065         |                              |             | 1.08        |                        |
|         |      | Hulst       | 0.163      |             | 0.103                             |            | 0.870         |                              |             |             |                        |
|         |      | Heikant     | 0.166      |             | 0.070                             |            | 3.31          |                              | 0.186       | 0.307       |                        |
|         | 2012 | Nieuw-Namen | 22.9       |             |                                   |            | 0.162         |                              |             | 6.91        |                        |
|         |      | Hulst       | 0.035      | 0.058       |                                   |            | 0.185         |                              |             | 0.193       |                        |
|         |      | Heikant     | 0.064      |             | 0.040                             |            | 2.88          |                              | 0.107       |             |                        |
|         | 2013 | Nieuw-Namen | 3.27       |             | 0.123                             |            | 0.520         |                              |             | 1.90        |                        |
|         |      | Hulst       |            |             |                                   |            | 0.816         |                              |             | 0.680       |                        |
|         |      | Heikant     |            | 0.044       |                                   |            | 2.25          |                              |             |             |                        |
|         | 2014 | Nieuw-Namen |            |             | 0.031                             | 0.164      |               |                              | 0.166       |             |                        |
|         |      | Hulst       |            |             | 0.198                             | 2.39       | 0.720         |                              |             |             |                        |
|         |      | Heikant     |            | 0.042       | 1.17                              | 7.35       | 1.14          |                              | 0.169       |             |                        |
|         | 2015 | Nieuw-Namen | 0.708      | 0.035       |                                   |            |               |                              |             | 0.232       |                        |
|         |      | Hulst       | 0.042      | 0.070       | 0.184                             | 2.50       | 0.890         |                              |             |             |                        |
|         |      | Heikant     | 0.340      | 0.248       |                                   |            | 1.08          |                              |             |             |                        |
|         | 2016 | Nieuw-Namen | 0.267      |             |                                   |            | 0.071         | 1.649                        |             |             |                        |
|         |      | Hulst       |            | 0.039       | 0.030                             | 0.627      | 0.627         |                              |             |             |                        |
|         |      | Heikant     | 0.039      | 0.131       | 0.025                             | 0.131      | 1.735         |                              |             |             |                        |
|         | 2017 | Nieuw-Namen | 0.217      |             |                                   |            | 0.041         | 1.67                         |             | 0.173       |                        |
|         |      | Hulst       |            | 0.032       | 0.024                             | 0.388      | 1.60          |                              |             |             |                        |
|         |      | Heikant     |            | 0.031       |                                   |            | 2.84          |                              |             |             |                        |
|         | 2018 | Nieuw-Namen |            |             |                                   |            | 0.041         |                              | 0.207       |             |                        |
|         |      | Hulst       |            | 0.048       | 0.012                             |            | 0.258         |                              |             |             |                        |
|         |      | Heikant     | 0.019      | 0.032       | 0.012                             |            | 1.44          |                              |             | 0.328       |                        |
|         | 2019 | Nieuw-Namen |            |             | 0.034                             | 0.647      | 0.036         |                              |             |             |                        |
|         |      | Hulst       |            | 0.980       | 0.392                             | 4.73       | 0.230         | 89.9                         | 2.21        |             |                        |
|         |      | Heikant     |            | 0.021       | 0.063                             | 0.499      | 2.10          | 43.7                         | 0.504       |             |                        |
|         | 2020 | Nieuw-Namen | 0.144      | 0.359       | 0.090                             | 1.45       | 0.191         | 23.2                         | 0.483       | 2.40        | 0.048                  |
|         |      | Hulst       |            | 0.235       |                                   | 0.422      |               | 33.3                         | 0.949       | 0.017       |                        |
|         |      | Heikant     |            |             | 0.047                             | 0.617      | 0.049         | 160                          | 0.499       |             |                        |
|         | 2021 | Nieuw-Namen | 0.475      | 0.213       |                                   | 1.50       | 0.617         | 13.6                         | 1.02        | 2.30        |                        |
|         |      | Hulst       | 0.055      | 0.017       |                                   | 0.574      |               | 27.0                         | 0.602       | 0.038       |                        |
|         |      | Heikant     |            | 0.014       |                                   | 1.52       | 0.033         | 270                          | 0.302       |             |                        |
|         | 2022 | Nieuw-Namen |            | 0.009       |                                   | 0.012      | 0.020         |                              | 0.025       |             |                        |
|         |      | Hulst       | 0.003      | 0.031       |                                   | 0.101      | 0.004         | 62.2                         | 0.102       | 0.094       |                        |
|         |      | Heikant     |            |             |                                   | 2.14       | 0.027         | 395                          | 0.101       |             |                        |

Table S5. Continued

| Section | Year | Location   | Chydoridae | Halacaridae | nauplius<br>larvae of<br>copepods | Cyclopoida | Harpacticoida | <i>Aesellus<br/>aquaticus</i> | Turbellaria | Oligochaeta | other<br>invertebrates |
|---------|------|------------|------------|-------------|-----------------------------------|------------|---------------|-------------------------------|-------------|-------------|------------------------|
| West    | 2011 | Phillipine | 0.147      | 0.041       |                                   | 0.164      |               |                               |             |             |                        |
|         |      | Axel       | 0.879      |             | 0.111                             | 0.586      | 0.059         |                               | 0.148       |             | 0.001                  |
|         |      | Cadzand    | 0.142      | 0.512       | 0.089                             | 1.10       | 0.000         |                               |             |             | 0.001                  |
|         | 2012 | Phillipine | 5.66       | 0.319       | 0.134                             | 0.568      | 0.114         |                               |             |             |                        |
|         |      | Axel       | 16.0       |             | 0.702                             | 7.11       | 0.904         |                               |             | 0.539       |                        |
|         |      | Cadzand    | 0.079      | 0.427       | 0.423                             | 0.404      |               |                               |             |             |                        |
|         | 2013 | Phillipine | 0.049      | 0.205       | 0.217                             | 0.818      |               |                               |             |             |                        |
|         |      | Axel       |            | 0.161       | 0.637                             | 4.010      |               |                               |             |             |                        |
|         |      | Cadzand    |            | 0.220       | 0.359                             | 0.878      | 0.058         |                               |             |             |                        |
|         | 2014 | Phillipine | 0.840      | 0.105       | 0.212                             | 3.22       |               |                               |             | 0.234       | 0.014                  |
|         |      | Axel       | 1.93       | 0.345       | 0.167                             | 5.41       | 0.101         |                               |             |             |                        |
|         |      | Cadzand    | 4.14       | 0.065       | 0.024                             | 0.129      | 0.828         | 3.29                          |             |             |                        |
|         | 2015 | Phillipine | 0.743      | 0.034       |                                   | 0.825      | 0.000         |                               |             |             |                        |
|         |      | Axel       | 19.2       | 0.354       | 0.803                             | 7.72       | 1.95          |                               | 0.159       |             |                        |
|         |      | Cadzand    | 4.66       | 0.062       | 0.186                             | 0.740      | 4.59          |                               | 0.125       | 0.206       |                        |
|         | 2016 | Phillipine | 1.47       | 0.254       |                                   | 0.845      | 0.473         |                               |             | 0.016       |                        |
|         |      | Axel       |            | 0.270       | 0.522                             | 5.01       | 25.2          |                               | 0.243       |             |                        |
|         |      | Cadzand    | 1.11       | 0.103       | 0.026                             | 0.275      | 0.440         |                               |             |             |                        |
|         | 2017 | Phillipine | 0.104      | 0.489       |                                   |            | 0.046         |                               |             |             |                        |
|         |      | Axel       | 0.102      | 0.085       | 0.686                             | 1.74       | 9.40          |                               | 0.688       |             |                        |
|         |      | Cadzand    | 1.27       | 0.061       | 0.062                             | 0.417      | 0.260         |                               |             |             |                        |
|         | 2018 | Phillipine |            | 0.299       | 0.011                             | 0.229      | 0.000         |                               |             |             |                        |
|         |      | Axel       |            | 0.045       | 0.170                             | 3.11       | 3.95          |                               |             |             |                        |
|         |      | Cadzand    |            | 0.028       | 0.234                             | 1.71       | 0.045         |                               | 0.057       |             |                        |
|         | 2019 | Phillipine | 0.075      | 0.104       | 0.047                             | 0.417      | 0.267         |                               |             | 0.139       |                        |
|         |      | Axel       |            | 0.068       | 0.188                             | 1.92       | 0.289         |                               | 1.19        | 1.66        | 0.018                  |
|         |      | Cadzand    | 0.061      |             |                                   |            |               |                               | 0.215       |             |                        |
|         | 2020 | Phillipine | 0.281      | 0.059       |                                   |            | 0.562         |                               | 0.236       | 0.196       |                        |
|         |      | Axel       |            |             | 0.024                             | 0.376      | 0.050         |                               | 0.380       |             |                        |
|         |      | Cadzand    |            |             |                                   |            | 0.145         |                               | 0.548       |             |                        |
|         | 2021 | Phillipine | 1.18       | 0.159       |                                   | 0.080      | 4.59          |                               | 0.684       | 0.266       |                        |
|         |      | Axel       |            | 0.007       |                                   | 2.29       | 0.068         |                               | 0.029       | 0.283       |                        |
|         |      | Cadzand    |            | 0.311       |                                   | 0.493      | 0.034         |                               | 2.38        | 0.036       |                        |
|         | 2022 | Phillipine | 0.601      | 0.276       |                                   |            | 6.16          |                               | 0.279       |             |                        |
|         |      | Axel       |            | 0.017       |                                   | 2.85       | 0.194         |                               | 0.110       | 5.95        |                        |
|         |      | Cadzand    |            | 0.039       |                                   | 0.268      | 0.009         |                               | 0.890       | 0.317       |                        |

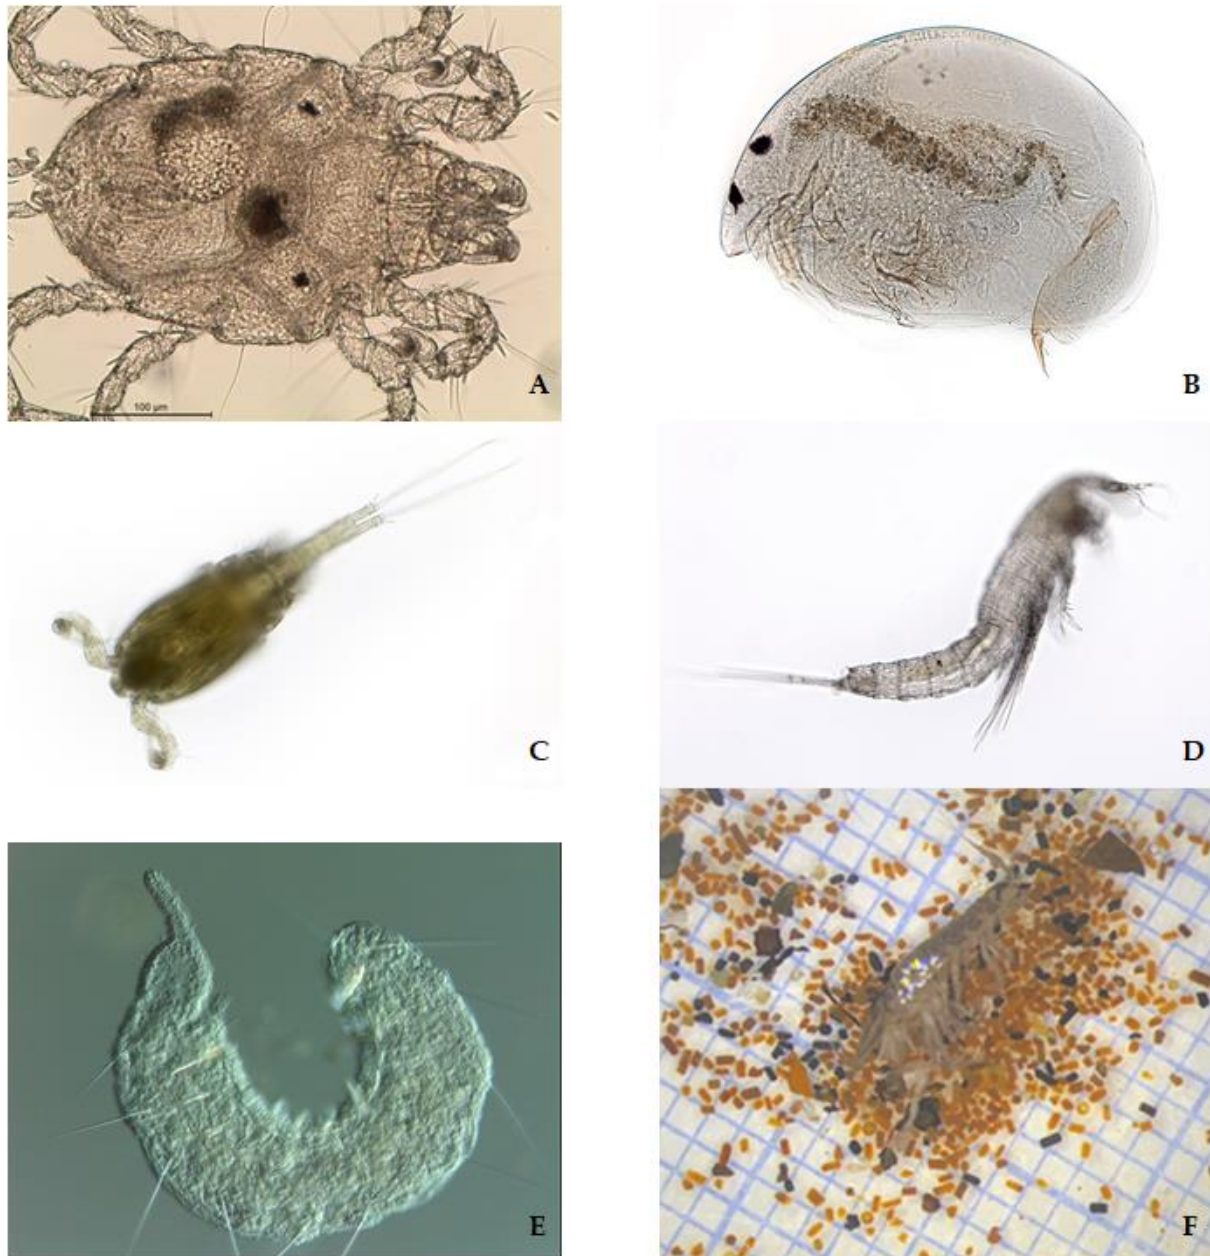

**Figure S1.** Photos of the most relevant invertebrate taxa in the DWDSs.

A: *Soldanellonyx monardi* (Halacaridae adult); B: *Phreatalona protzi* (Chydoridae); C : *Eucyclops serrulatus* (Cyclopoida, male); D: *Nitokra hibernica* (Harpacticoida); E: *Pristina* sp. (Oligochaeta); F: *Asellus aquaticus* and fecal pellets (Isopoda).

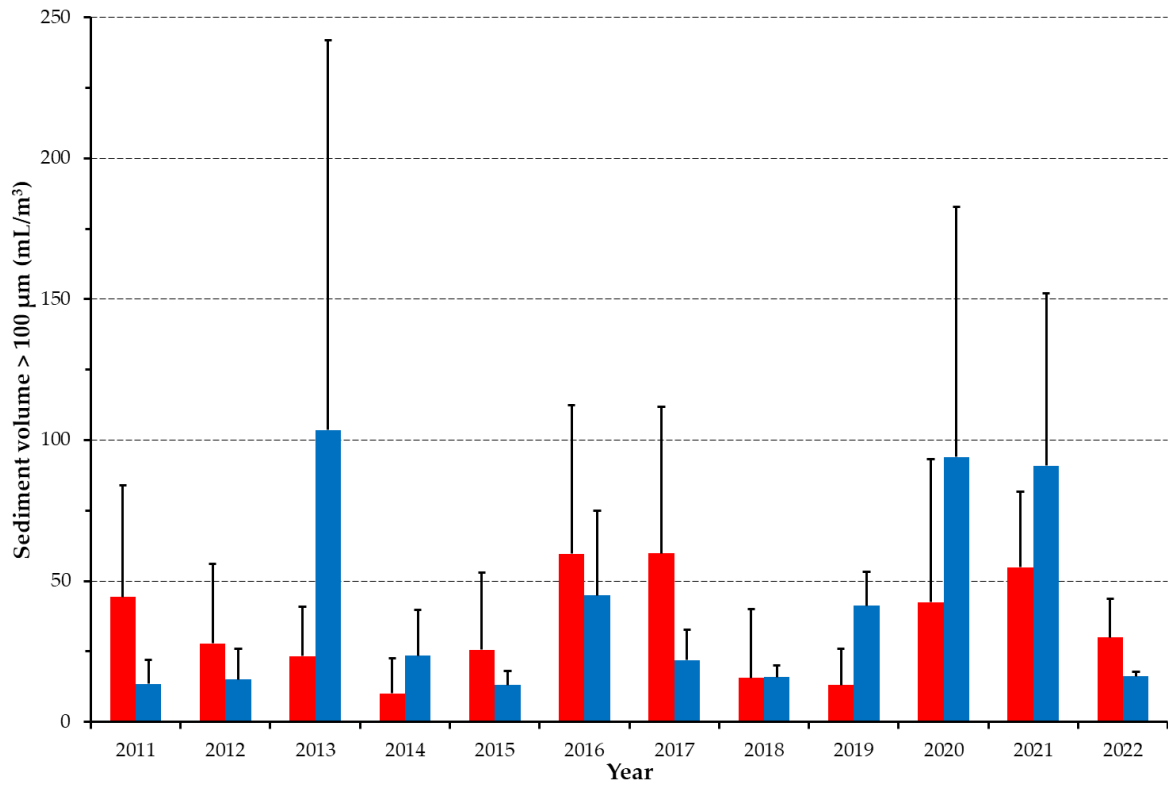

**Figure S2.** Average (with standard deviation,  $n=3$ ) sediment volume larger than 100  $\mu\text{m}$  in the eastern section of the DWDS (■) and in the western section of the DWDS (■).

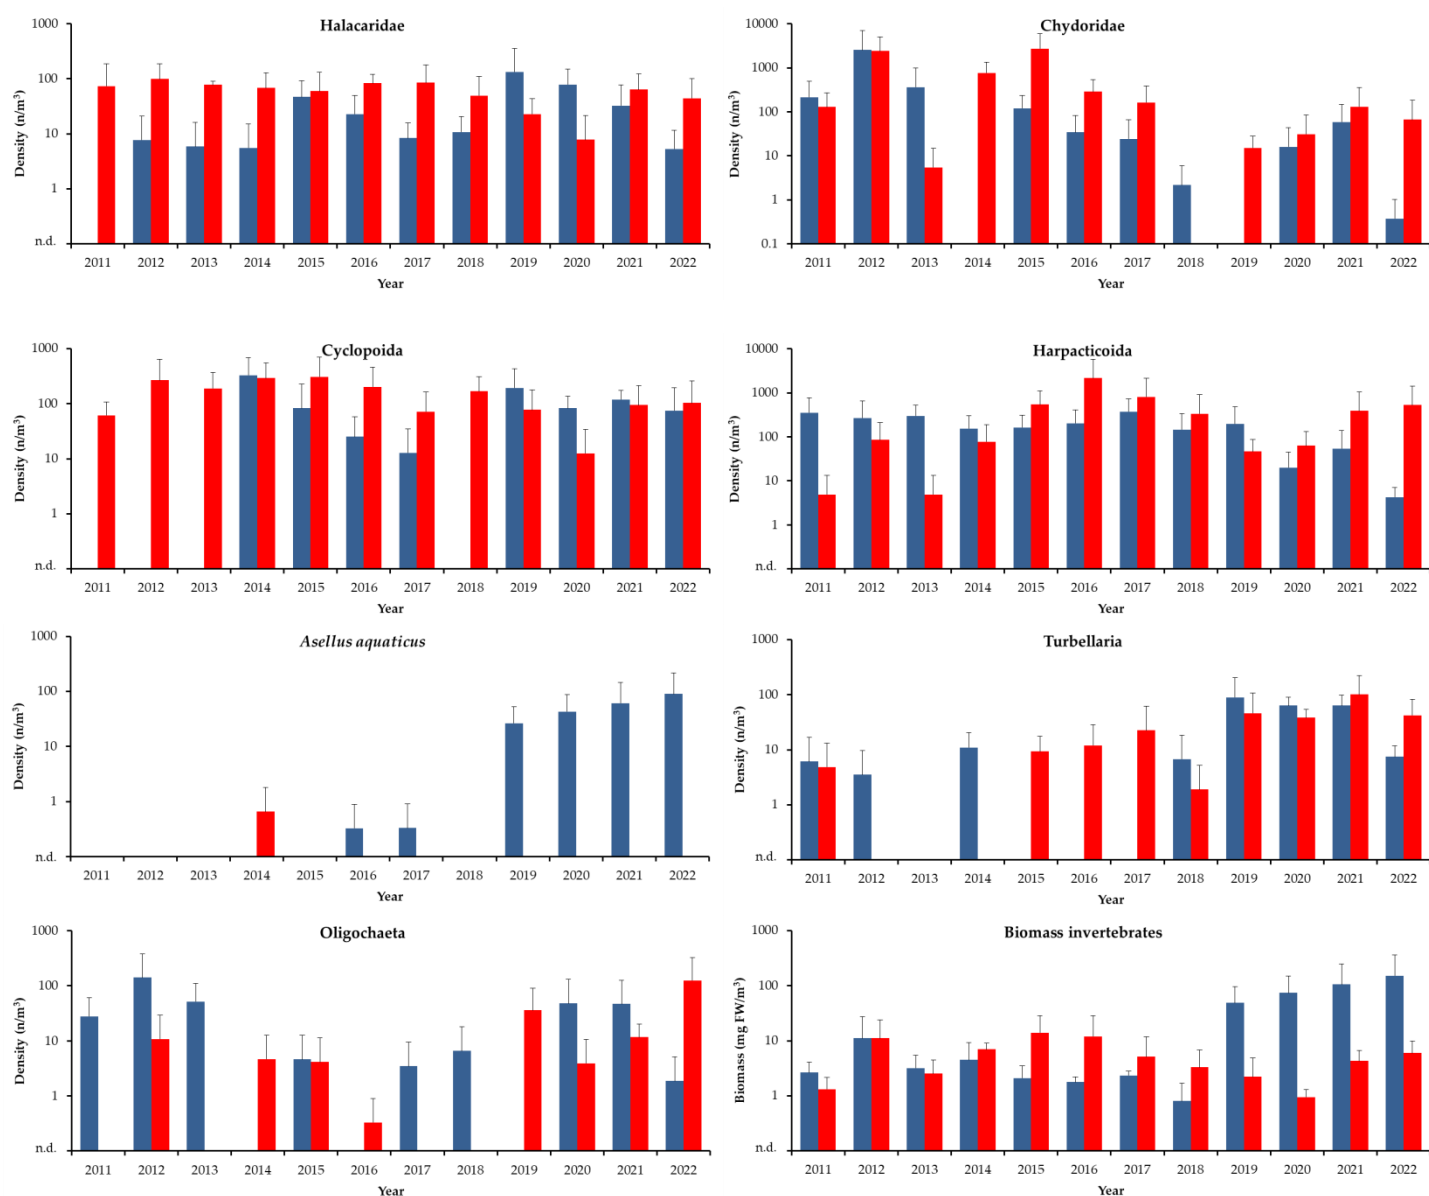

**Figure S3.** Average with standard deviation density of relevant invertebrates and biomass in flush samples per year in the eastern section of the DWDS (■) and in the western section of the DWDS (■). n.d.: not detected.
